# Supplementary material
Source: PubMed Central journal article supplement (PMC3001502)
Supplement: 092128_1.pdf [file 092128_1.pdf]

## Appendix 1 (as supplied by the authors): Example menu plan of diets for 2000 kcal

|                   | Control Diet               | grams                   | High MUFA Diet                          | grams   | Low MUFA Diet                           |         |
|-------------------|----------------------------|-------------------------|-----------------------------------------|---------|-----------------------------------------|---------|
| <b>Breakfast:</b> | <i>Cereal:</i>             |                         | <i>Hot Cereal:</i>                      |         | <i>Hot Cereal:</i>                      |         |
|                   | Bran flakes cereal*        | 30                      | Oat bran                                | 40      | Oat bran                                | 40      |
|                   | Skim milk                  | 220                     | Unsweetened Soy Beverage                | 250     | Soy Beverage                            | 200     |
|                   | <i>Fruit &amp; Yogurt:</i> |                         | Strawberries                            | 50      | Strawberries                            | 150     |
|                   | Strawberries               | 100                     | <i>Drink:</i>                           |         | Sugar                                   | 3       |
|                   | Fat Free Yogurt*           | 175                     | Psyllium (+ water 250ml)                | 7       | <i>Drink:</i>                           |         |
|                   | Strawberry Jam*            | 10                      | <i>Toast:</i>                           |         | Psyllium (+ water 250ml)                | 7       |
|                   |                            |                         | Bread, Oatbran                          | 65      | <i>Toast:</i>                           |         |
|                   |                            |                         | Strawberry Jam*                         | 15      | Oatbran bread                           | 30      |
|                   |                            |                         | Study margarine (Plant sterol-enriched) | 12      | Strawberry Jam*                         | 12      |
|                   |                            |                         | High-MUFA Sunflower Oil                 | 13      | Study margarine (Plant sterol-enriched) | 65      |
| <b>Snack</b>      | Pear                       | 133                     | Almonds                                 | 15      | Almonds                                 | 15      |
|                   | Skim milk                  | 220                     | Pear                                    | 102     | Pear                                    | 197     |
| <b>Lunch</b>      | <i>Soup:</i>               |                         | <i>Soup:</i>                            |         | <i>Soup:</i>                            |         |
|                   | Pasta & Fagioli Soup*      | 270                     | Barley Vegetable Soup*                  | 45      | Barley Vegetable Soup*                  | 45      |
|                   | <i>Sandwich:</i>           |                         | <i>Sandwich:</i>                        |         | <i>Sandwich:</i>                        |         |
|                   | Whole wheat bread          | 90                      | Oatbran bread                           | 65      | Oatbran bread                           | 65      |
|                   | Light Margarine            | 35                      | Study margarine (Plant sterol-enriched) | 13      | Study margarine (Plant sterol-enriched) | 13      |
|                   | Fat Free Cheese            | 42                      | Soy Deli Slices*                        | 62      | Soy Deli Slices*                        | 62      |
|                   | <i>Salad:</i>              |                         | <i>Salad:</i>                           |         | <i>Salad:</i>                           |         |
|                   | Lettuce, Romaine           | 30                      | Lettuce, Romaine                        | 30      | Lettuce, Romaine                        | 30      |
|                   | Cucumber                   | 50                      | Cucumber                                | 50      | Cucumber                                | 50      |
|                   | Tomato                     | 100                     | Tomato                                  | 100     | Tomato                                  | 100     |
|                   | Oil, Olive                 | 11                      | Almonds (chopped)                       | 12      | Almonds (chopped)                       | 12      |
|                   | Vinegar                    | 10                      | High-MUFA Sunflower Oil                 | 12      |                                         |         |
|                   | <b>Snack</b>               | Ancient Grain Crackers* | 10                                      | Almonds | 15                                      | Almonds |
| Orange            |                            | 133                     | Apple                                   | 103     | Orange                                  | 197     |
|                   |                            |                         | Unsweetened Soy Beverage                | 250     | Soy Beverage                            | 200     |
| <b>Dinner</b>     | <i>Entree:</i>             |                         | <i>Soup or stew:</i>                    |         | <i>Soup or stew:</i>                    |         |
|                   | Cheese Cannelloni*         | 246                     | Low-Fat Extra-Firm Tofu*                | 120     | Low-Fat Extra-Firm Tofu*                | 120     |
|                   | <i>Bake/grill:</i>         |                         | Okra                                    | 100     | Okra                                    | 100     |
|                   | Safflower Oil              | 15                      | Cauliflower                             | 100     | Cauliflower                             | 100     |
|                   | Cauliflower                | 150                     | Onions                                  | 30      | Onions                                  | 30      |
|                   | Onions                     | 30                      | Green pepper                            | 50      | Green pepper                            | 50      |
|                   | Green pepper               | 50                      | Pearled barley                          | 35      | Pearled barley                          | 35      |
|                   | Fat Free Cheese            | 42                      | High-MUFA Sunflower Oil                 | 18      |                                         |         |
| Sunflower Oil     | 6                          |                         |                                         |         |                                         |         |
| <b>Snack</b>      | Skim milk                  | 220                     | Unsweetened Soy Beverage                | 225     | Soy Beverage                            | 150     |
|                   | Apple                      | 133                     | Psyllium (+ water 250ml)                | 7       | Psyllium (+ water 250ml)                | 7       |
|                   |                            |                         |                                         |         | Apple                                   | 196     |

\*these products were Blue Menu line products (Loblaws, Toronto, Canada)
