# Supplementary material
Source: PubMed Central journal article supplement (PMC3001502)
Supplement: 092128_2.pdf [file 092128_2.pdf]

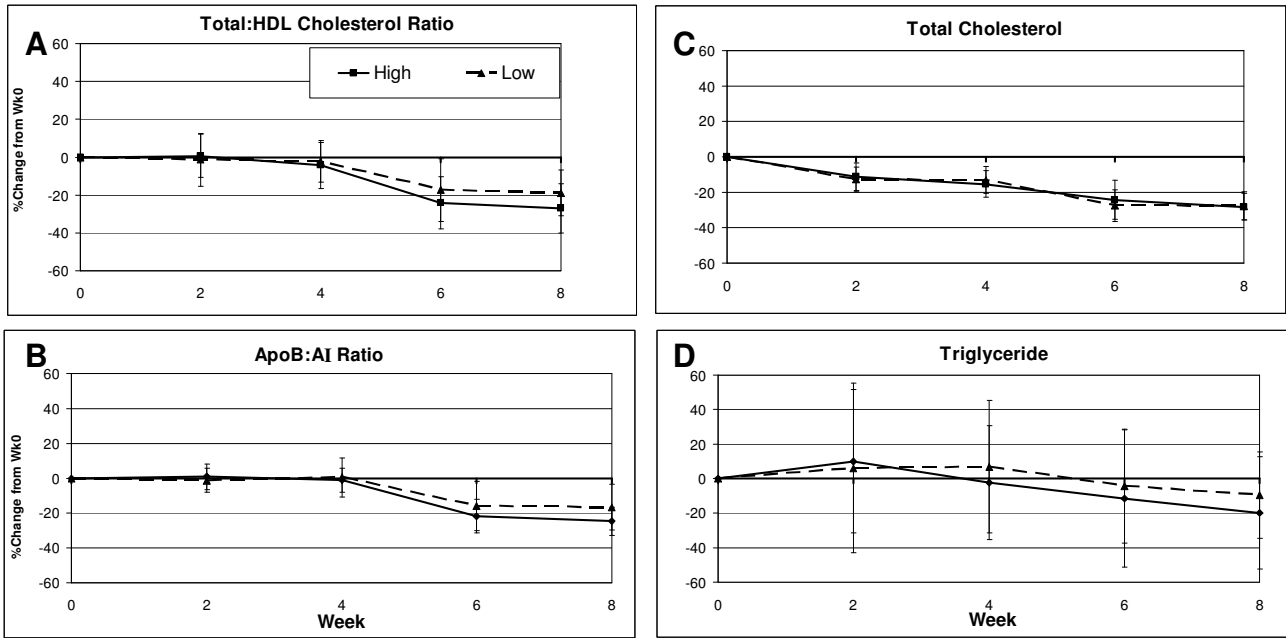

**Appendix 2** (as supplied by the authors): Mean percentage change (and standard deviation) from baseline in (A) ratio of total to HDL cholesterol ( $p = 0.025$ ), (B) ratio of apolipoprotein B to apolipoprotein AI ( $p = 0.046$ ), (C) total cholesterol ( $p = 0.24$ ), and (D) triglyceride ( $p = 0.92$ ) with dietary portfolios having high and low levels of monounsaturated fatty acid (MUFA). Significance of differences between treatments was determined by repeated-measures analysis.
